# Supplementary material
Source: HighWire-hosted journal article supplement (http://www.qdcxjkg.com/highwire/filestream/113904/field_highwire_adjunct_files/0/ERJ-00001-2013_Disclosures.pdf)
Supplement: ERJ-00001-2013_Disclosures.pdf [file ERJ-00001-2013_Disclosures.pdf]

**P.J.Sterk:** the institute of P.J. Sterk has received a public-private grant from the Innovative Medicines Initiative (IMI) by the European Union (EU) and the European Federation of Pharmaceutical Industries and Associations (EFPIA).
